# Supplementary material
Source: PubMed Central journal article supplement (PMC8480032)

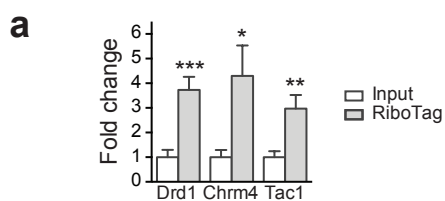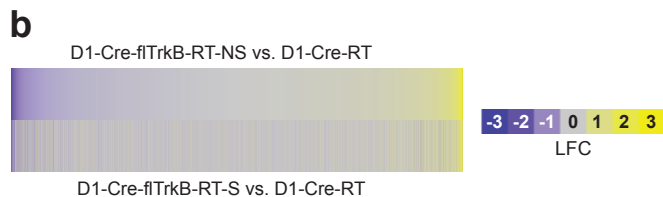

**c**

| Cluster | Enriched GO category                    | # genes | p value   |
|---------|-----------------------------------------|---------|-----------|
| 3       | Cell surface receptor signaling pathway | 20      | 1.02 E-05 |
| 4       | Regulation of signal transduction       | 29      | 1.11 E-08 |
| 4       | Regulation of kinase activity           | 15      | 6.95 E-08 |
| 4       | Negative regulation of MAPK cascade     | 7       | 1.58 E-06 |
| 4       | Receptor binding                        | 18      | 9.03 E-06 |

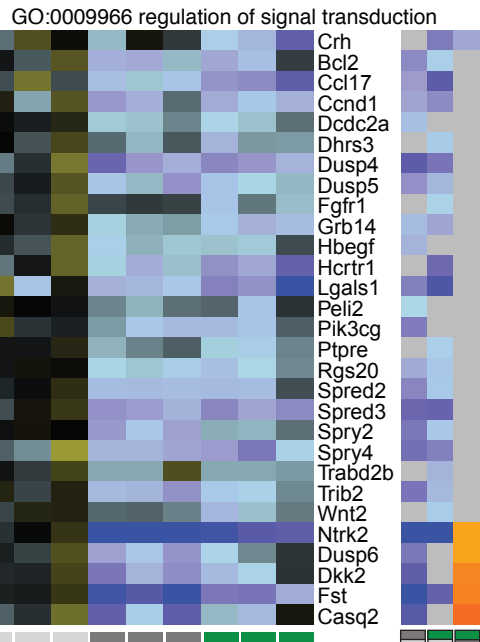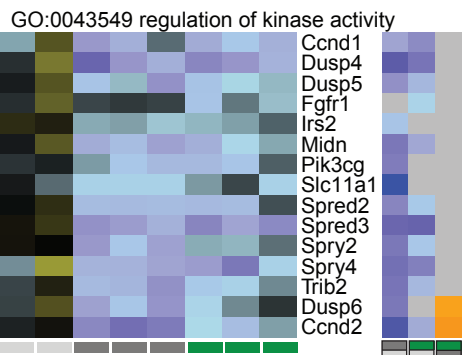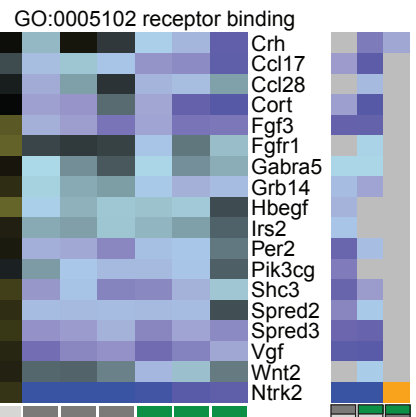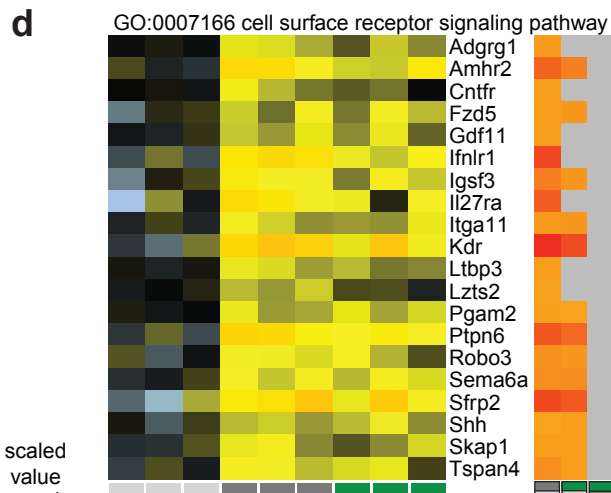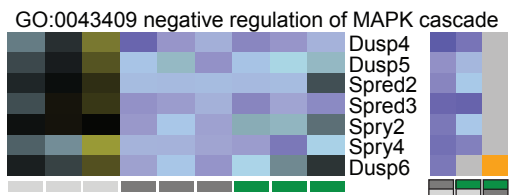

Supplement: NIHMS1586301-supplement-3.pdf [file NIHMS1586301-supplement-3.pdf]
