# Supplementary material
Source: PubMed Central journal article supplement (PMC8480032)

**a** GO:0030030 Cell projection organization

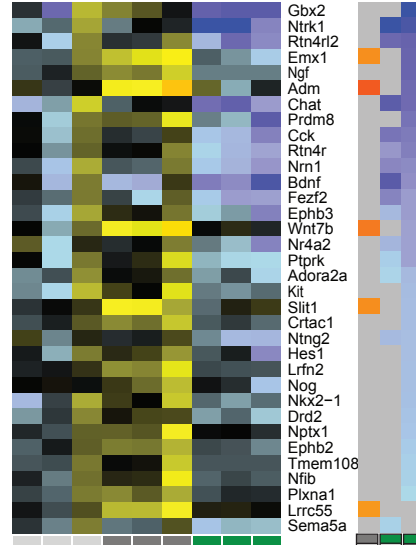

GO:0010975 Reg. of neuron projections development

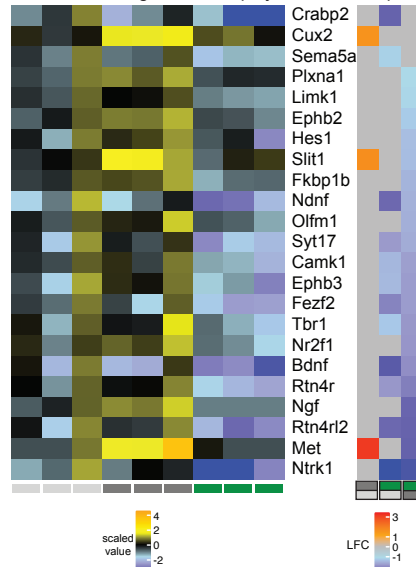

GO:0009966 Regulation of signal transduction

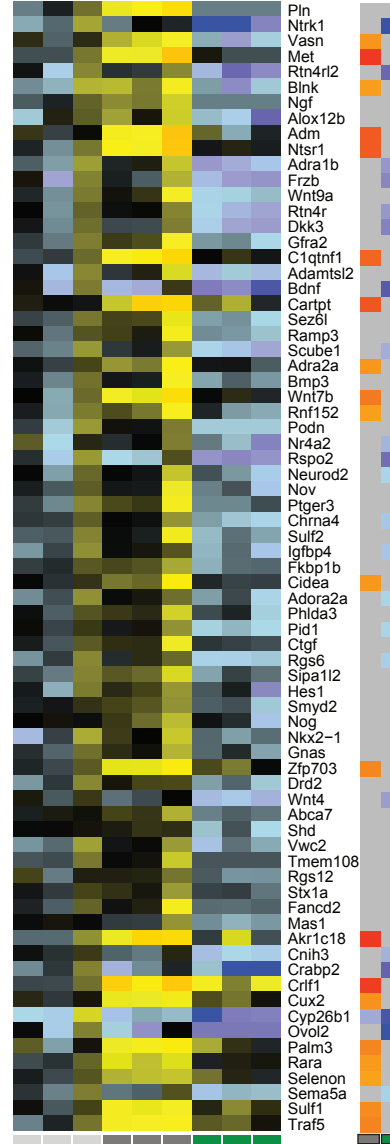

GO:0050803 Regulation of synapse structure or activity

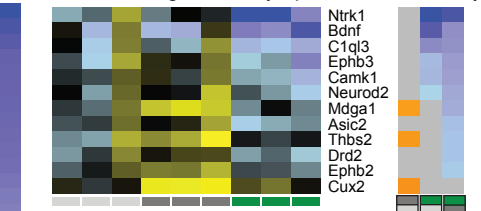

GO:0040012 Regulation of locomotion

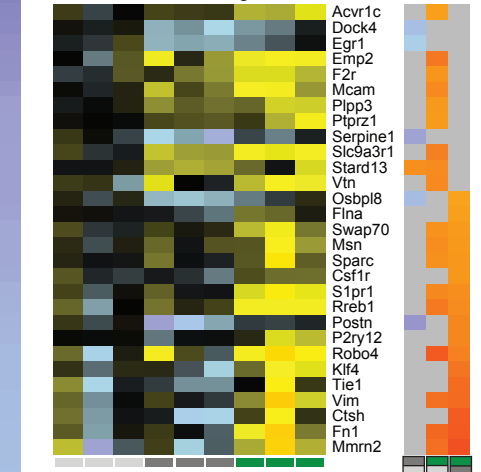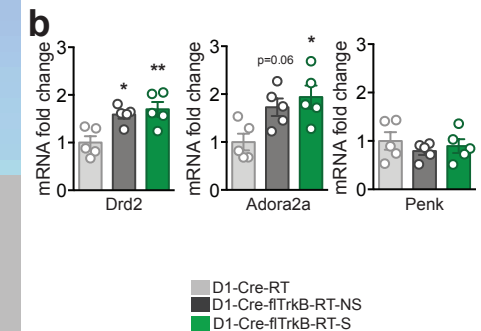

Supplement: NIHMS1586301-supplement-4.pdf [file NIHMS1586301-supplement-4.pdf]
