# Supplementary material
Source: PubMed Central journal article supplement (PMC8480032)

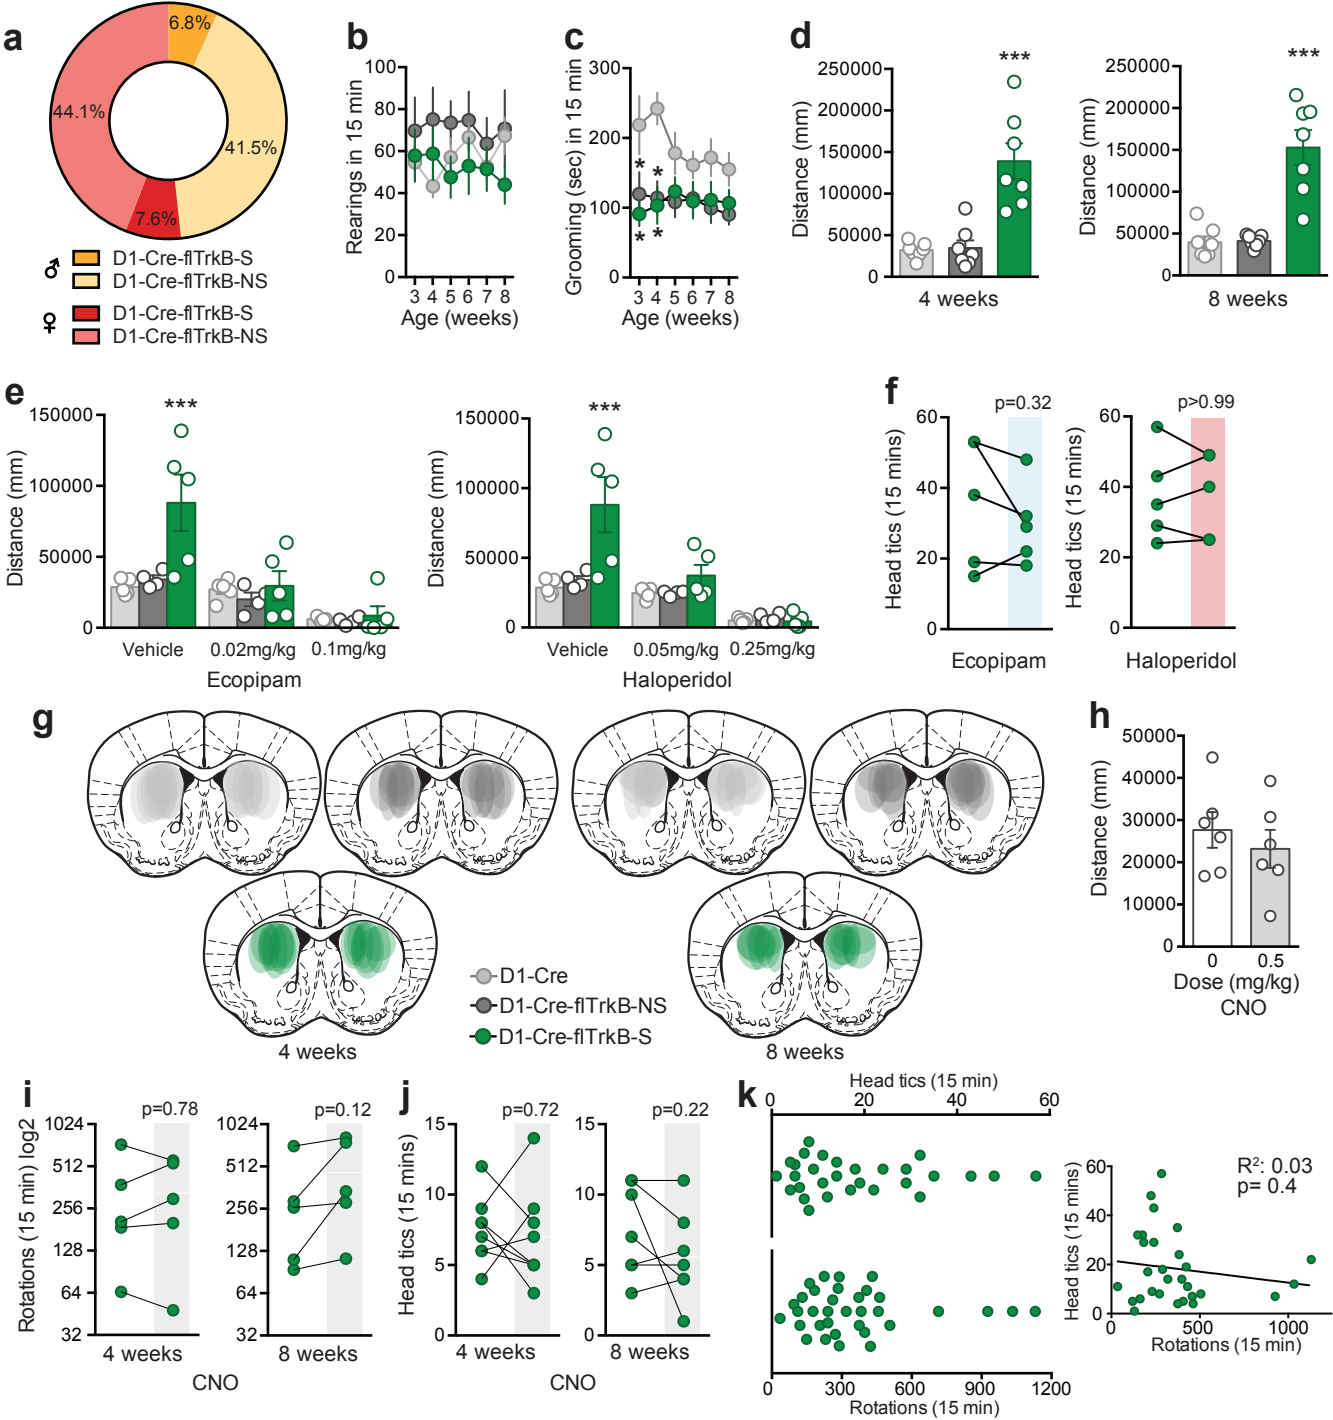

Supplement: NIHMS1586301-supplement-2.pdf [file NIHMS1586301-supplement-2.pdf]

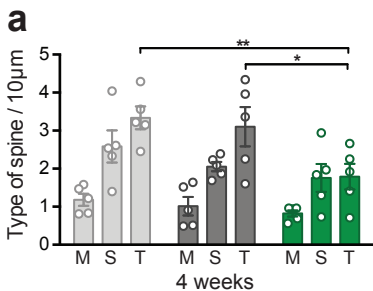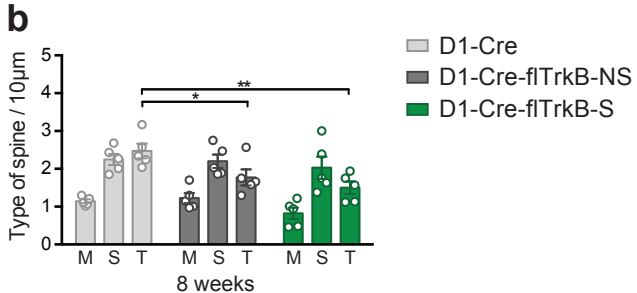

Supplement: NIHMS1586301-supplement-5.pdf [file NIHMS1586301-supplement-5.pdf]
